# 1 Evolution of corticosteroid specificity for human, chicken, 2 alligator and frog glucocorticoid receptors

3  
4 Yoshinao Katsu<sup>1, 2, \*</sup>, Satomi Kohno<sup>3</sup>, Kaori Oka<sup>1</sup>, Michael E. Baker<sup>4, \*</sup>

5  
6 <sup>1</sup>Graduate School of Life Science, Hokkaido University, Sapporo, Japan; <sup>2</sup>Department  
7 of Biological Sciences, Hokkaido University, Sapporo, Japan; <sup>3</sup>Department of  
8 Obstetrics and Gynecology, Medical University of South Carolina, and Marine  
9 Biomedicine and Environmental Science Center, Hollings Marine Laboratory,  
10 Charleston, SC, USA; <sup>4</sup>Department of Medicine, University of California, San Diego,  
11 CA, USA

12  
13 Correspondence:

14 [ykatsu@sci.hokudai.ac.jp](mailto:ykatsu@sci.hokudai.ac.jp)

15 [mbaker@ucsd.edu](mailto:mbaker@ucsd.edu)

16  
17 **Abstract.** We investigated the evolution of the response of human, chicken, alligator  
18 and frog glucocorticoid receptors (GRs) to dexamethasone, cortisol, corticosterone,  
19 11-deoxycorticosterone, 11-deoxycortisol and aldosterone. We find significant  
20 differences among these vertebrates in the transcriptional activation of their full length  
21 GRs by these steroids, indicating that there were changes in the specificity of the GR for  
22 steroids during the evolution of terrestrial vertebrates. To begin to study the role of  
23 interactions between different domains on the GR in steroid sensitivity and specificity  
24 for terrestrial GRs, we investigated transcriptional activation of truncated GRs  
25 containing their hinge domain and ligand binding domain (LBD) fused to a GAL4 DNA  
26 binding domain (GAL4 DBD). Compared to corresponding full length GRs,  
27 transcriptional activation of GAL4 DBD-GR hinge/LBD constructs required higher  
28 steroid concentrations and displayed altered steroid specificity, indicating that  
29 interactions between the hinge/LBD and other domains are important in glucocorticoid  
30 activation of these terrestrial GRs.

31  
32 **Short Title:** Evolution of steroid specificity for terrestrial GRs

33 **Key Words:** Glucocorticoid Receptor, Evolution, Allosteric Regulation, terrestrial  
34 vertebrates

35 **1. Introduction**

1           Glucocorticoids (Figure 1) regulate a variety of physiological functions  
2 including carbohydrate and protein metabolism, blood pressure, immune function and  
3 the body's anti-inflammatory processes via transcriptional activation of the  
4 glucocorticoid receptor (GR) [1-5]. The GR and other steroid receptors belong to the  
5 nuclear receptor family, a large family of transcription factors, which includes receptors  
6 for thyroid hormone, retinoids and other small lipophilic molecules [6-10]. The GR  
7 and other steroid receptors have a characteristic modular structure consisting of an  
8 N-terminal domain (NTD) (domains A and B), a central DNA-binding domain (DBD)  
9 (domain C), a hinge domain (D) and a C-terminal ligand-binding domain (LBD)  
10 (domain E) [9, 11-14] (Figure 2). The E domain alone is competent to bind steroids  
11 [11, 12, 15-18].

12           The NTD contains an activation function 1 [AF1] domain, which is a strong  
13 transcriptional activator of the GR [19-21]. Interestingly, AF1 is intrinsically  
14 disordered, unlike the DBD and LBD [21-23]. Allosteric interactions between AF1  
15 and other domains on the GR and coactivators lead to a conformational rearrangement  
16 of AF1 that is important in transcriptional activation of the GR [23-26]. In rat GR,  
17 there is evidence that allosteric interactions between DBD and other domains regulate  
18 gene transcription [27, 28]. Recent crystal structures of the DBD-Hinge-LBD domains  
19 of other nuclear receptors [13, 22] identified allosteric signaling between the DBD and  
20 LBD domains. [27, 28].

21           Although dexamethasone (DEX) and cortisol (F) activation of rodent [29] and  
22 human [20, 30-33] GRs has been investigated, there has been no systematic  
23 assessment of ligand specificity among phylogenetically diverse terrestrial vertebrate  
24 GRs, such as amphibians, reptiles, birds and mammals. It is possible that more than  
25 one corticosteroid may act as a physiological glucocorticoid in terrestrial vertebrates.  
26 Reports of transcriptional activation by corticosteroids of the GR for other terrestrial  
27 vertebrates: amphibians, reptiles and birds, are limited [34, 35]. Oka et al. [34]  
28 reported half-maximal response (EC<sub>50</sub>) values for transcriptional activation of full  
29 length alligator GR by F, corticosterone (B), 11-deoxycorticosterone (DOC) and  
30 aldosterone (Aldo). The EC<sub>50</sub>s for F and B were 0.29 nM and 0.16 nM, respectively,  
31 which is consistent with the known role of these two steroids as glucocorticoids in  
32 mammals. However, the EC<sub>50</sub>s for Aldo and DOC were 2.9 nM and 2.8 nM, which is  
33 unexpected because both steroids have a lower binding affinity for human GR [30,  
34 32]and are weak transcriptional activators of human GR [30, 36]. Similar intriguing  
35 findings for Aldo were reported for chicken GR by Proszkowiec-Weglarz and Porter  
36 [35], who found that the EC<sub>50</sub>s for transcriptional activation of chicken GR by Aldo

1 and B were 0.8 nM and 1.8 nM, respectively, with the level of transcription due to B  
2 being about 30% higher than to Aldo. The EC<sub>50</sub>s of DOC and other corticosteroids  
3 for chicken GR and of DEX for alligator GR were not determined.  
4

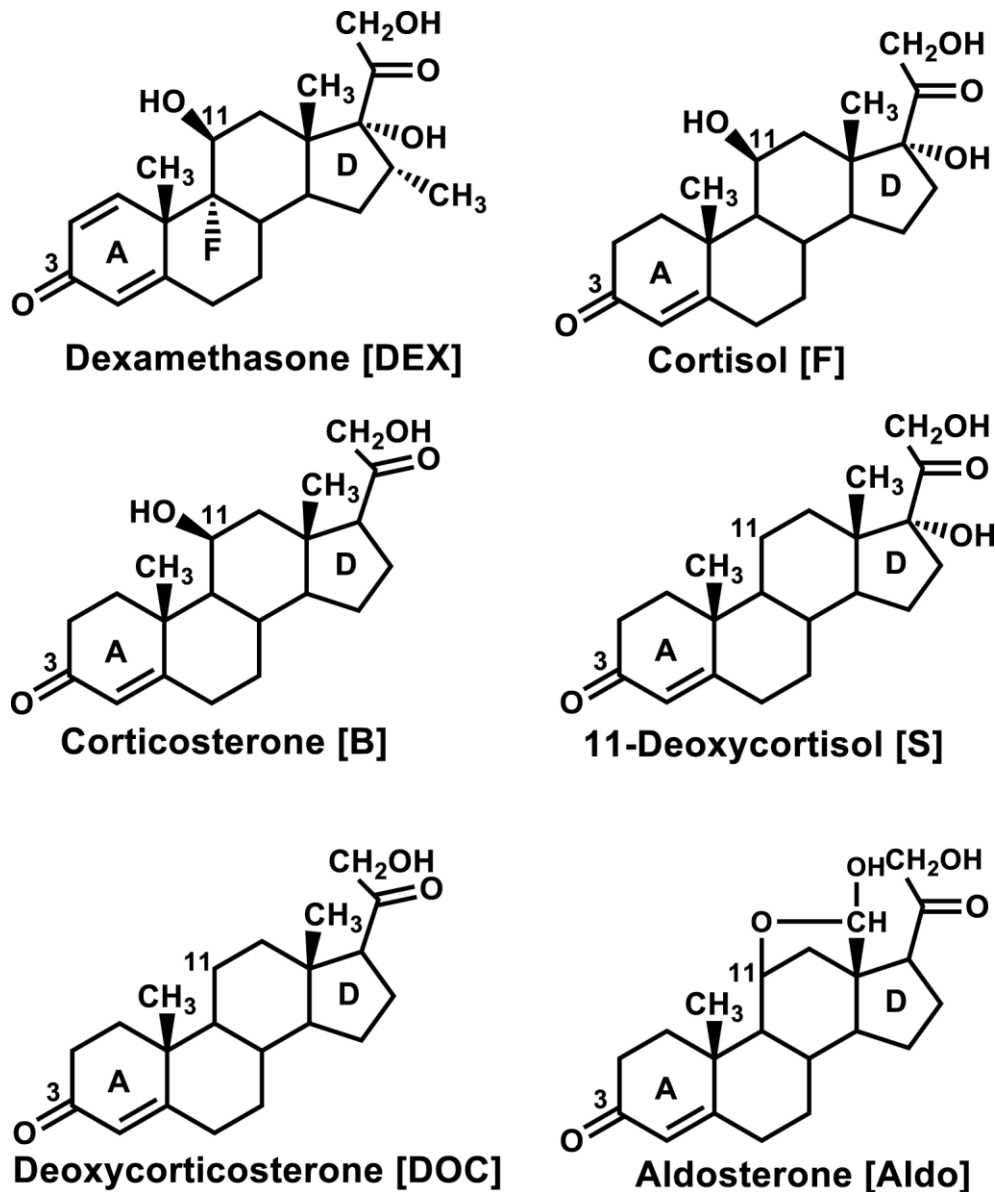

5  
6  
7 **Figure 1. Structures of various corticosteroids.**

8 Cortisol and corticosterone are physiological glucocorticoids in terrestrial vertebrates and  
9 ray-finned fish [12, 37, 38]. Aldosterone, 11-deoxycorticosterone and 11-deoxycortisol are  
10 physiological mineralocorticoids [12, 39-41]. Aldo and DOC are weak transcriptional  
11 activators of human GR [30, 32, 36]. 11-deoxycortisol is both a mineralocorticoid and a  
12 glucocorticoid in lamprey [42].

13  
14

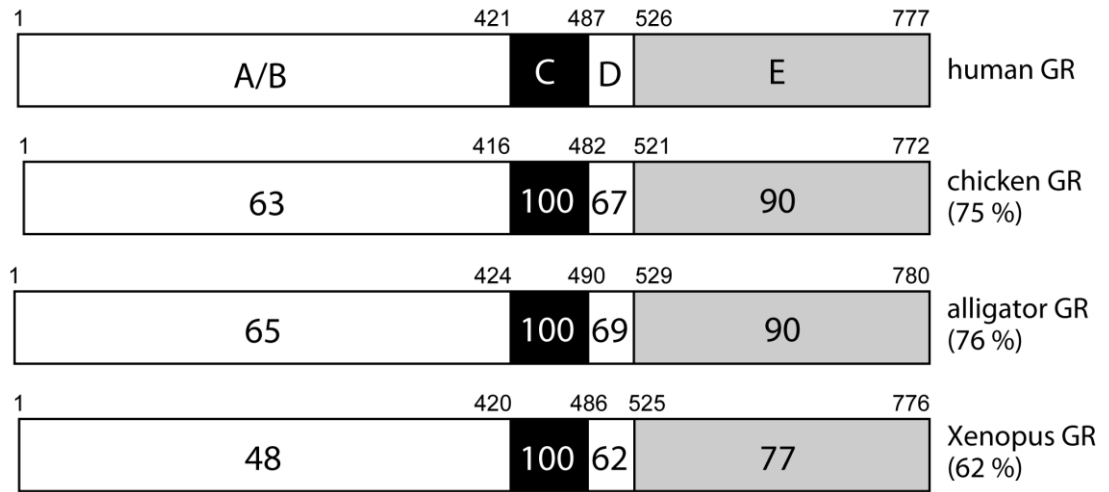

### Figure 2. Comparison of domains in some terrestrial vertebrate GRs.

GRs from human, chicken, alligator and *X. laevis* are compared. The functional A/B domain to E domains are schematically represented with the numbers of amino acid residues and the percentage of amino acid identity between the domain in the human GR and the corresponding domain in the other vertebrate GRs. For example, the entire human GR sequence is 75% identical to that of chicken GR, while domain E (LBD) on human GR is 90% identical to that of chicken GR.

GenBank accession numbers: human GR (NM\_000176), chicken GR (NM\_001037826), alligator GR (AB701407), *X. laevis* GR (NM\_001088062).

These unexpected responses of alligator and chicken GRs to Aldo and our interest in the evolution of specificity for corticosteroids in the GR in vertebrates [12, 34, 41, 43, 44] motivated us to investigate the response to a panel corticosteroids of the GR from chicken and the amphibian [*Xenopus laevis*] for comparison to human and alligator GR with the goal of clarifying the evolution of corticosteroid specificity in terrestrial vertebrates. In addition, we were interested in investigating the role of domains A-C and domains D-E [13, 21-23, 44-47] in the response of GRs to steroids. The influence of domains A-C on steroid responses for the GR has not been studied previously in non-mammalian terrestrial vertebrates. For these studies we constructed a plasmid containing the GAL4 DBD fused to the D domain and E domain of the GR (GR-LBD).

Interestingly, we found significant differences in the EC50s of these full length GRs to corticosteroids indicating that during the evolution of these terrestrial vertebrates there were changes in their response to various corticosteroids. Moreover, in the presence of corticosteroids, truncated GRs containing a GR LBD fused to a GAL4 DBD

1 had a higher EC<sub>50</sub> value (weaker activation) than their corresponding full length GRs,  
2 indicating altered steroid specificity among these terrestrial vertebrate GRs and that the  
3 evolution of the response of terrestrial vertebrate GRs to different steroids was complex.  
4 These differences may involve allosteric signaling between the domains D-E and  
5 other GR domains [22, 44, 45] or alterations in the binding of co-regulator proteins [24,  
6 48, 49] or the absence of post-translational modification of domains A, B or C [49-51],  
7 or combinations of these mechanisms.

## 8 9 **2. Materials and Methods**

### 10 **2.1 Chemical reagents**

11 DEX, F, B, aldosterone (Aldo), DOC and 11-deoxycortisol (S) were purchased  
12 from Sigma-Aldrich. For the reporter gene assays, all hormones were dissolved in  
13 dimethylsulfoxide (DMSO) and the final concentration of DMSO in the culture medium  
14 did not exceed 0.1%.

### 15 **2.2 Construction of plasmid vectors**

16 The full-coding regions and D/E domains of the GR from *X. laevis*, alligator,  
17 chicken and human were amplified by PCR with KOD DNA polymerase (TOYOBO  
18 Biochemicals, Osaka, Japan). The PCR products were gel-purified and ligated into  
19 pcDNA3.1 vector (*KpnI-NotI* site for human, chicken and alligator GRs, and  
20 *HindIII-NotI* site for *X. laevis* GR) (Invitrogen) for the full-coding region or pBIND  
21 vector (*MluI-NotI* site) (Promega) for D-E domains. As shown in Figure 2, the D  
22 domain begins at human GR (N487), chicken GR (N482), alligator GR (N490) and *X.*  
23 *laevis* GR (N486) [34].

### 24 25 **2.3 Transactivation Assay and Statistical Methods**

26 CHO-K1 cells (Chinese hamster ovary cell) were used in the reporter gene assay.  
27 Transfection and reporter assays were carried out as described previously [34, 52].  
28 The use of CHO-K1 cells and an assay temperature of 37C does not replicate the  
29 physiological environment of *X. laevis*, alligator and chicken. Nevertheless, studies  
30 with mammalian cell lines at 37C have proven useful for other studies of transcriptional  
31 activation by corticosteroids of teleost fish GRs [53-56] and other non-mammalian GRs  
32 [35, 57, 58]. Levels of expression of the different non-mammalian GRs and their  
33 truncated counterparts may differ in CHO-K1 cells. However, comparisons of the  
34 EC<sub>50</sub> of different corticosteroids for each GR would be valid, which is the goal of our  
35 study. All transfections were performed at least three times, employing triplicate  
36 sample points in each experiment. The values shown are mean ± SEM from three

1 separate experiments, and dose-response data and EC50 were analyzed using GraphPad  
2 Prism. Comparisons between two groups were performed using *t*-test, and all  
3 multi-group comparisons were performed using one-way ANOVA followed by  
4 Bonferroni test.  $P < 0.05$  was considered statistically significant.

5

### 6 **3. Results**

#### 7 **3.1 Different steroid-response for full length and truncated human, chicken, 8 alligator and *X. laevis* GRs.**

##### 9 **3.11 Human GR**

10 In Figures 3A and B, we show corticosteroid-inducible transcriptional activation  
11 of full length and truncated (GAL4 DBD-GR LBD) human GRs by DEX, F, B, Aldo,  
12 DOC and S. At  $10^{-7}$  M, all corticosteroids induced transcription of full length human  
13 GR via the MMTV-reporter gene. In contrast, truncated human GR had a strong  
14 response to DEX, a much weaker response to F, a small response to B and no response  
15 to Aldo, DOC and S.

16

##### 17 **3.12 Chicken GR**

18 Transcription of full length chicken GR was activated by all corticosteroids at  
19  $10^{-7}$  M, with a similar strong response to B, Aldo and DOC and a lesser response to  
20 DEX, F and S (Figure 3C). Truncated chicken GR was strongly activated by B, F,  
21 DEX and Aldo, with a weaker response to DOC and S (Figure 3D).

22

##### 23 **3.13 Alligator GR**

24 Transcription of full length alligator GR was activated by all corticosteroids at  
25  $10^{-7}$  M, with a similar strong response to B, Aldo and DOC and a lower response to  
26 DEX, F and S (Figure 3E). Truncated alligator GR was strongly activated by DEX, F  
27 and B, with lower response to Aldo and S and a very weak response to DOC (Figure  
28 3F).

29

##### 30 **3.14 *X. laevis* GR**

31 Transcription of full length *X. laevis* GR was activated by all corticosteroids at  
32  $10^{-7}$  M, with a similar strong response to DEX and B and a lower response to F, Aldo  
33 and DOC and much lower response to S (Figure 3G). Truncated *X. laevis* GR was  
34 strongly activated by DEX and B, with a much lower response to F and Aldo and a no  
35 response to DOC and S (Figure 3H).

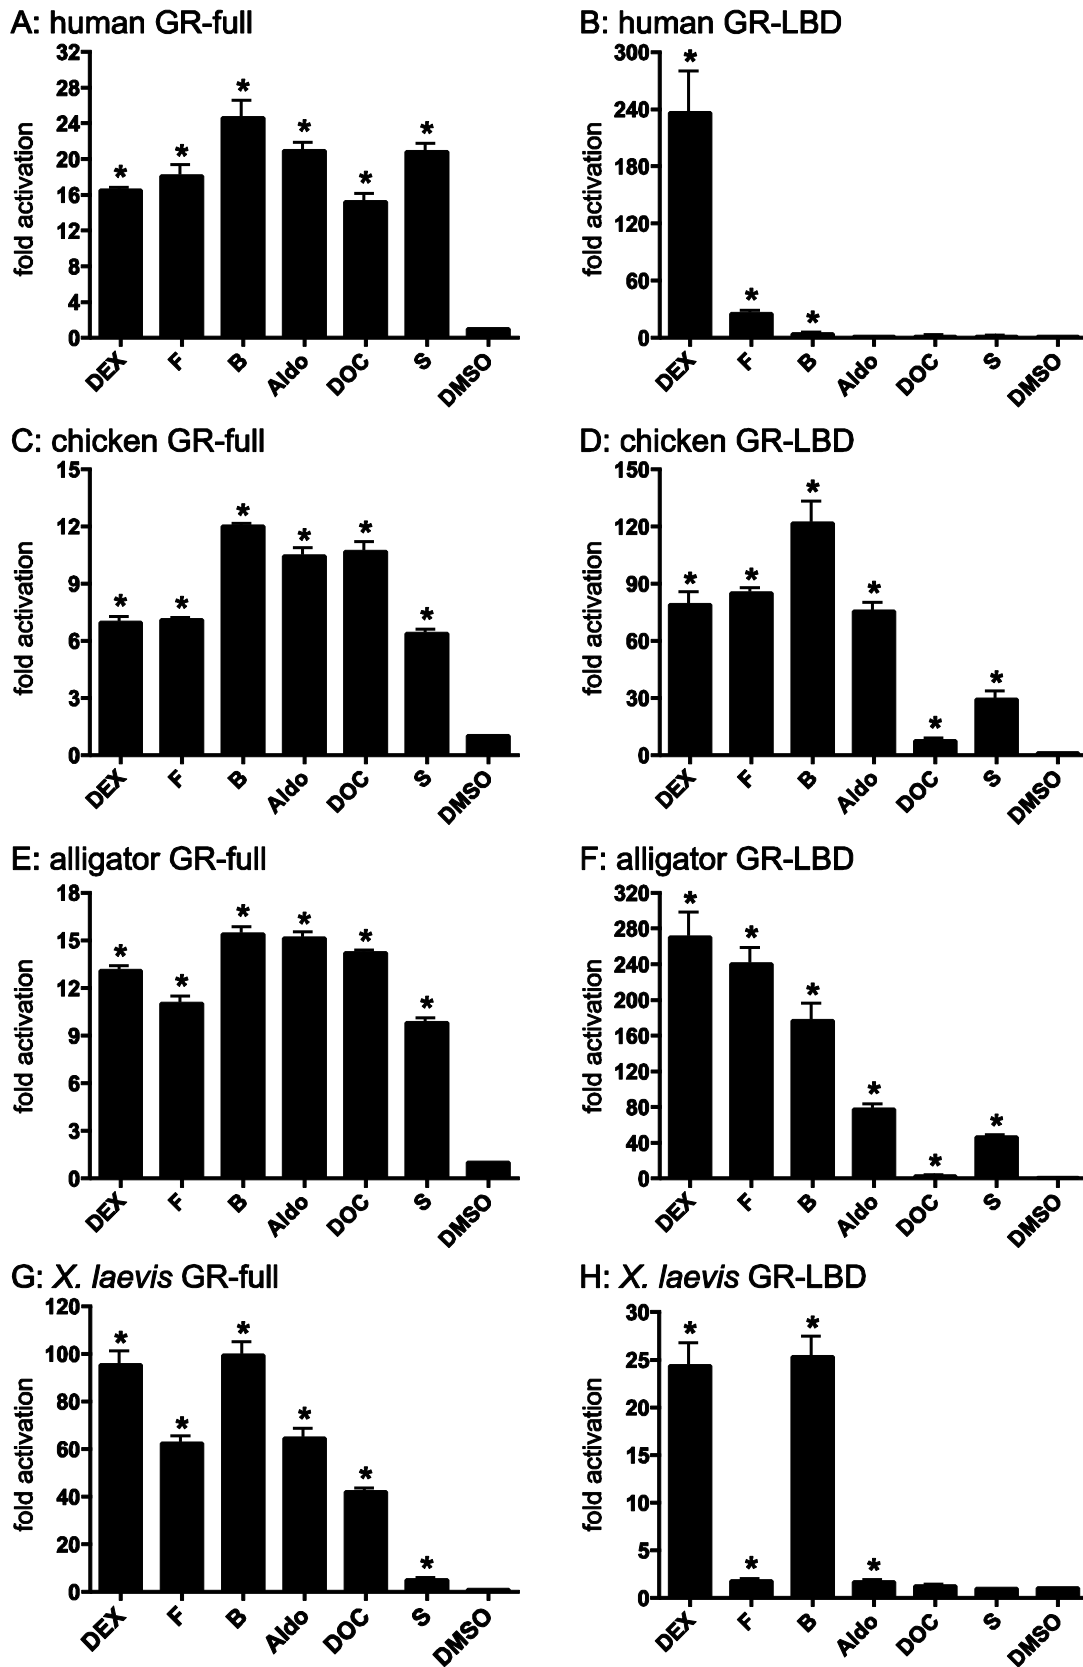

1

2 **Figure 3. Ligand-specificities of human, chicken, alligator and *X. laevis* full length GRs**  
3 **and LBD GRs.**

4 Full-length human GR (A), chicken GR (C), alligator GR (E), and *X. laevis* GR (G) were

5 expressed in CHO-K1 cells with an MMTV-luciferase reporter. Plasmids for corresponding

1 truncated GRs (human (B), chicken (D), alligator (F) and *X. laevis* (H) containing the D domain  
2 and LBD (E domain) fused to a GAL4-DBD were expressed in CHO-K1 cells with a luciferase  
3 reporter containing GAL4 binding site. Cells were treated with  $10^{-7}$  M DEX, F, B, Aldo, DOC,  
4 S or vehicle alone (DMSO). Results are expressed as means  $\pm$  SEM, n=3. Y-axis indicates  
5 fold-activation compared to the activity of control vector with vehicle (DMSO) alone as 1.  
6 Transcriptional activation of the different GRs in the presence of the DMSO control is at  
7 background level, indicating that these GRs do not have constitutive activity.

8  
9

### 10 **3.15 EC50 values for transcriptional activation of full length human, chicken, 11 alligator and *X. laevis* GRs**

12 Next we examined the concentration-dependence of transcriptional activation of  
13 full length terrestrial vertebrate GRs by DEX, F, B, Aldo, DOC and S (Figure 4, Table  
14 1). Compared to the other steroids, DEX has the lowest EC50 for all of the full length  
15 GRs (Table 1). Interestingly, there are significant differences among the GRs of the  
16 EC50s for other corticosteroids, including F and B, which are the major physiological  
17 glucocorticoids in terrestrial vertebrates. For example, for full length GRs, B has a  
18 lower EC50 than F for *X. laevis* GR, while F has a lower EC50 than B for human,  
19 chicken and alligator GR.

20 Aldo, which is a mineralocorticoid, has an EC50 of 2.7 nM and 44 nM  
21 respectively, for alligator GR and *X. laevis* GR and an EC50 of 2 nM and 82 nM,  
22 respectively, for chicken and human GR. DOC, which also is a mineralocorticoid, has  
23 an EC50 of 2.6 nM and 23 nM, respectively, for alligator GR and *X. laevis* GR, and an  
24 EC50 of 0.63 nM and 110 nM, respectively, for chicken GR and human GR.  
25 Interestingly, S has an EC50 of 0.17 nM and 0.35 nM, respectively, for chicken and  
26 alligator GR, and a much higher EC50 for human GR [50 nM] and *X. laevis* GR [530  
27 nM].

28

### 29 **3.16 EC50 values for transcriptional activation of truncated (GAL4 DBD-GR 30 LBD) terrestrial vertebrate GRs**

31 The concentration-dependence of transcriptional activation of truncated  
32 terrestrial vertebrate GRs by DEX, F, B, Aldo, DOC and S is shown in Figure 4 and  
33 Table 1. Transcriptional activation by several steroids was dramatically different  
34 among the terrestrial vertebrate GRs that lacked the A-C domains. For example,  
35 truncated human GR has a strong response to DEX (EC50 = 8.3 nM) and a very weak  
36 response to F (EC50 = 1.2  $\mu$ M), and no significant response to B, Aldo, DOC or S.



1 This contrasts to truncated chicken GR, which has nM EC50s for DEX, F and B, and a  
2 weaker but significant response to Aldo and S. Only DOC does not activate truncated  
3 chicken GR. Truncated alligator GR has nM EC50s for DEX and F, a weaker but  
4 significant response to B (EC50 = 49 nM), a weak response to Aldo (EC50 = 0.16  $\mu$ M)  
5 and S (EC50 = 0.12  $\mu$ M) and no response to DOC.

6 These results suggest that allosteric signaling between the hinge/LBD and one or  
7 more of the A, B and C domains influences the response of terrestrial vertebrate GRs to  
8 corticosteroids.

9  
10 **Table 1. EC50 values for transcriptional activation by corticosteroids of terrestrial**  
11 **vertebrate GRs**

12  
13 **A. Full length GR (A-E domains)**

|                   | DEX                   | F                     | B                     | Aldo                 | DOC                   | S                     |
|-------------------|-----------------------|-----------------------|-----------------------|----------------------|-----------------------|-----------------------|
| Human GR-Full     | 1.7x10 <sup>-10</sup> | 5.6x10 <sup>-9</sup>  | 2.0x10 <sup>-8</sup>  | 8.2x10 <sup>-8</sup> | 1.1x10 <sup>-8</sup>  | 5.0x10 <sup>-8</sup>  |
| Chicken GR-Full   | 2.8x10 <sup>-11</sup> | 6.0x10 <sup>-11</sup> | 2.3x10 <sup>-10</sup> | 2.0x10 <sup>-9</sup> | 6.3x10 <sup>-10</sup> | 1.7x10 <sup>-10</sup> |
| Alligator GR-Full | 1.4x10 <sup>-10</sup> | 2.0x10 <sup>-10</sup> | 3.5x10 <sup>-10</sup> | 2.7x10 <sup>-9</sup> | 2.6x10 <sup>-9</sup>  | 3.5x10 <sup>-10</sup> |
| Xenopus GR-Full   | 7.3x10 <sup>-9</sup>  | 5.6x10 <sup>-8</sup>  | 5.1x10 <sup>-9</sup>  | 4.4x10 <sup>-8</sup> | 2.3x10 <sup>-8</sup>  | 5.3x10 <sup>-7</sup>  |

14

15 **B. Truncated GR (GAL4-DBD+GR-D+E domains)**

|                  | DEX                   | F                    | B                    | Aldo                 | DOC | S                    |
|------------------|-----------------------|----------------------|----------------------|----------------------|-----|----------------------|
| Human GR-LBD     | 8.3x10 <sup>-9</sup>  | 1.2x10 <sup>-6</sup> | -                    | -                    | -   | -                    |
| Chicken GR-LBD   | 2.5x10 <sup>-10</sup> | 1.6x10 <sup>-9</sup> | 6.5x10 <sup>-9</sup> | 7.7x10 <sup>-8</sup> | -   | 6.6x10 <sup>-8</sup> |
| Alligator GR-LBD | 3.1x10 <sup>-9</sup>  | 7.7x10 <sup>-9</sup> | 4.9x10 <sup>-8</sup> | 1.6x10 <sup>-7</sup> | -   | 1.2x10 <sup>-7</sup> |
| Xenopus GR-LBD   | 6.7x10 <sup>-8</sup>  | -                    | 4.8x10 <sup>-8</sup> | -                    | -   | -                    |

16

17

18

19

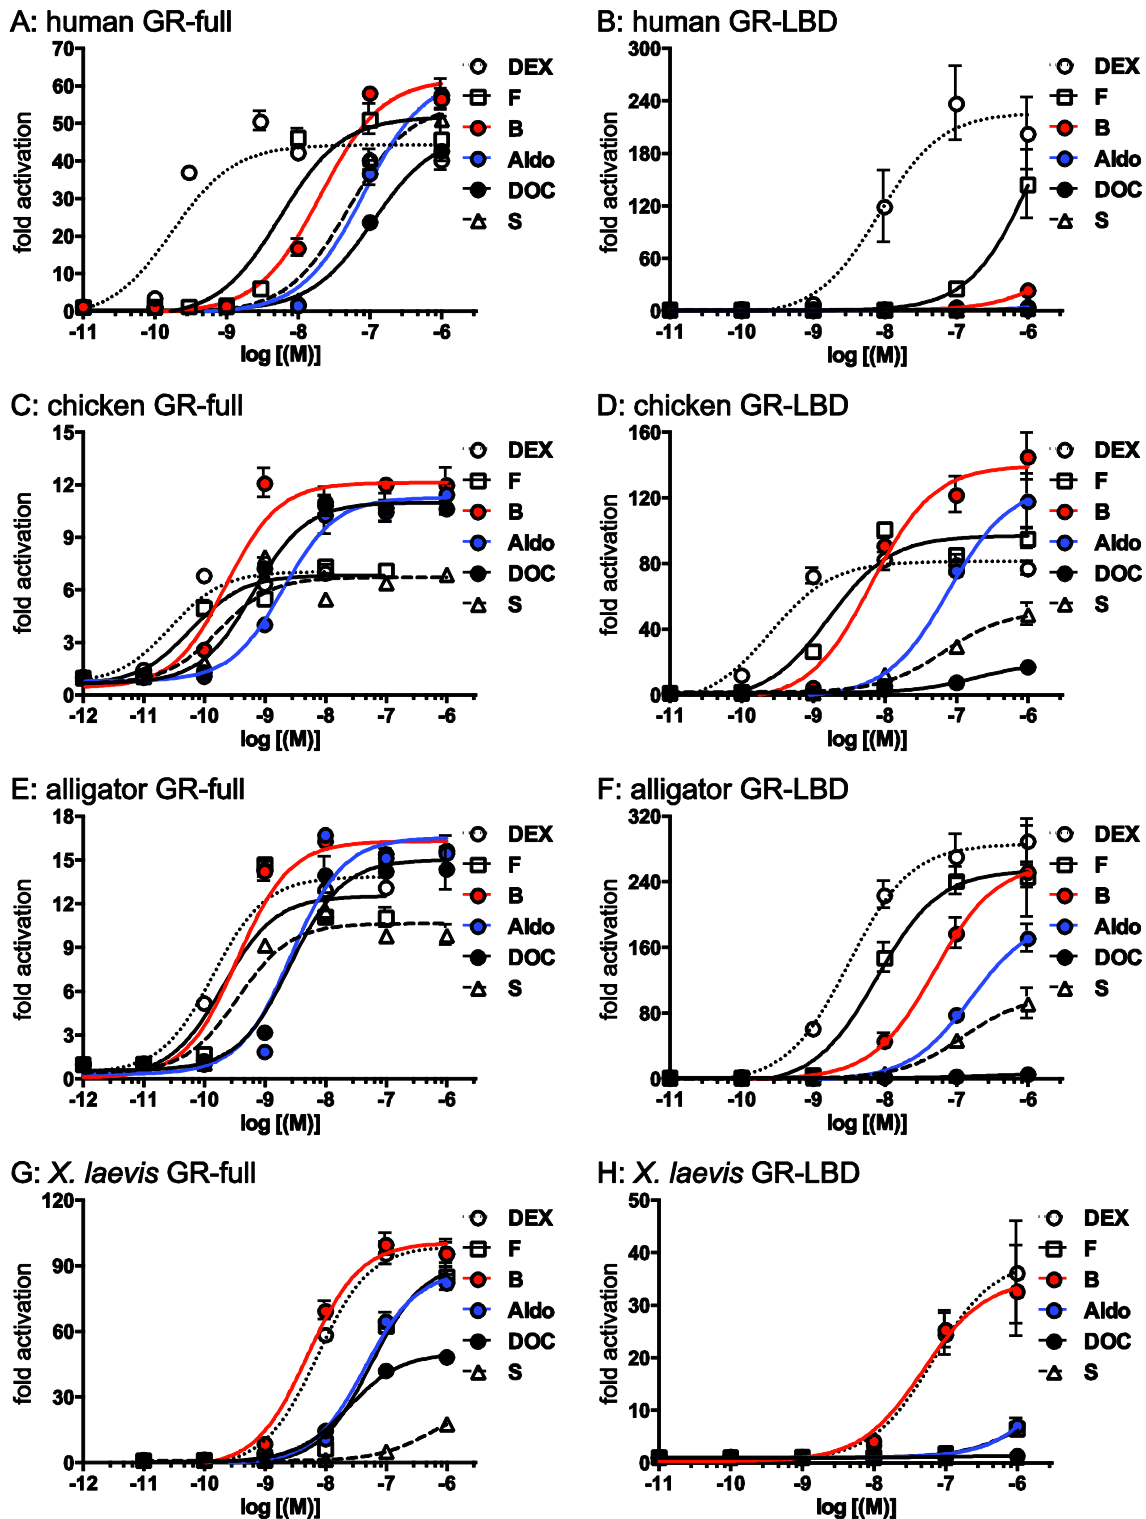

1

2 **Figure 4. Concentration-dependent transcriptional activation by corticosteroids of full**  
3 **length and truncated human, chicken, alligator and *X. laevis* GRs.**

4 Plasmids encoding full length GRs (A: human GR, C: chicken GR, E: alligator GR, G: *Xenopus*  
5 GR) or the GAL4-DBD fused to the D domain and LBD of GRs (B: human GR, D: chicken GR,  
6 F: alligator GR, H: *Xenopus* GR) were expressed in CHO-K1 cells and treated with increasing  
7 concentrations of DEX, F, B, Aldo, DOC, S or vehicle alone (DMSO). Y-axis indicates  
8 fold-activation compared to the activity of control vector with vehicle (DMSO) alone as 1.

1 **3.17 Analysis of a 25 residue segment on human GR and MR that influences**  
 2 **corticosteroid specificity**

3 Rogerson et al. [59] identified a combination of 12 amino acids in a 25 residue  
 4 segment, corresponding to the c-terminus of helix 5, a  $\beta$ -turn and helix 6 on human GR,  
 5 that could be replaced with corresponding residues from human MR to yield a hybrid  
 6 GR that had an EC50 of 3 nM for Aldo. In Figure 5, we compare this segment in  
 7 chicken, alligator and *X. laevis* GRs with the corresponding segments in human MR and  
 8 GR. The alignment does not reveal a pattern of similarity between chicken and  
 9 alligator GRs and human MR that can explain the lower EC50s that Aldo has for  
 10 chicken and alligator GRs compared to human and *X. laevis* GRs.

11

Figure 5. Exchange of Amino Acids in Human MR to Human GR that increase binding of Aldosterone.

|                    |     |                        |                   |     |     |     |  |
|--------------------|-----|------------------------|-------------------|-----|-----|-----|--|
| Human GR           |     | 615                    | 620               | 625 | 630 | 635 |  |
|                    |     |                        |                   |     |     |     |  |
| Human GR           | 614 | <u>RQSSANLLCFAPDLI</u> | <u>INEQRMTLPC</u> | 638 |     |     |  |
| Chicken GR         | 609 | KQSNGNLLCFAPDLI        | INEQRMNLPC        | 633 |     |     |  |
| Alligator GR       | 617 | KQSNGNLLCFAPDLI        | INEQRMSLPC        | 641 |     |     |  |
| <i>X.laevis</i> GR | 613 | KQTNGSILYFAPDLV        | ITEDRMHLPF        | 637 |     |     |  |
| Human MR           | 820 | <u>KHTNSQFLYFAPDLV</u> | <u>FNEEKMHQSA</u> | 844 |     |     |  |
|                    |     |                        |                   |     |     |     |  |
| Human MR           |     | 825                    | 830               | 835 | 840 |     |  |

Exchange of underlined amino acids from hMR to hGR yields a mutant GR with high affinity (Kd= 3nM) and low EC50 for Aldo.

12

13

14 **Figure 5. Analysis of a region in human GR and MR that is important for**  
 15 **mineralocorticoid specificity.**

16 Rogerson et al. [59] identified a segment in human MR that could be inserted into human GR  
 17 and increase its response to Aldo. We underline specific residues in the MR that replaced  
 18 residues in the GR to yield an increase in the response of the GR to Aldo. Also shown is the  
 19 corresponding region in chicken, alligator and *X. laevis* GRs. Residues that are conserved in  
 20 all vertebrate GRs are underlined.

21

## 1 4. Discussion

2 Although there are several reports of the response to different corticosteroids  
3 of the mammalian GR [20, 29-33, 36, 44], the corticosteroids that activate GRs from  
4 other terrestrial vertebrates have not been studied in depth. In birds and amphibians, B  
5 appears to be the physiological glucocorticoid [60, 61], and S has been found to be a  
6 physiological glucocorticoid in lamprey [42]. However, as discussed below, our data  
7 [Table 1] supports the presence of more than one physiological glucocorticoids in some  
8 terrestrial vertebrates. Also, our data indicate that there were changes in specificity for  
9 corticosteroids in the GR at key transitions in the evolution of terrestrial vertebrates.

10 As shown in Figures 3 and 4 and Table 1, we find significant differences in  
11 the response of full length GRs from *X. laevis*, alligator, chicken and humans to a panel  
12 of corticosteroids, providing evidence for the evolution of selectivity of terrestrial  
13 vertebrate GRs for F, B, Aldo, DOC and S. We confirm previous studies [34, 35] that  
14 Aldo has nM EC50s for full length chicken and alligator GR [34, 35]. This contrasts  
15 with the response to Aldo of full length human and *X. laevis* GR, for which the EC50 is  
16 82 nM and 44 nM, respectively. The low EC50s of B for chicken GR (0.23 nM),  
17 alligator GR (0.35 nM) and *X. laevis* GR (5.1 nM) are consistent with a role for B as a  
18 physiological glucocorticoid in these vertebrates [60, 61]. We also find that DOC,  
19 another mineralocorticoid [40, 41, 62], has a low EC50 for full length chicken GR (0.6  
20 nM) and alligator GR (2.6 nM), in contrast to DOC's higher EC50 for human GR (110  
21 nM) and *X. laevis* GR (23 nM). S also has a substantially lower EC50 for chicken GR  
22 (0.17 nM) and alligator GR (0.35 nM) compared to human GR (50 nM) and *X. laevis*  
23 GR (953 nM). The low EC50s of B, DOC and S for chicken and alligator GRs and of  
24 B for *X. laevis* GR leaves open the possibility that these steroids are physiological  
25 glucocorticoids in these vertebrates. There are regulatory implications for DOC and S  
26 as glucocorticoids because these steroids lack an 11 $\beta$ -OH group that is present in F and  
27 B [Figure 1]. Thus, DOC and S would be inert to 11 $\beta$ -HSD2, and could activate  
28 chicken and alligator GRs in tissues containing 11 $\beta$ -HSD2, which would inactivate B  
29 and F [1, 63-65].

30 Our studies with truncated GRs (hinge-LBD) reveal that one or more of the A,  
31 B and C domains are important in the response of terrestrial vertebrate GRs to  
32 corticosteroids. We find that compared to full length GRs, all of the truncated GRs  
33 (hinge-LBD) have substantially higher EC50s for all corticosteroids. For example, the  
34 EC50s of DEX and F for truncated human GR increased to 8.3 nM and 1.2  $\mu$ M,  
35 respectively. Moreover, Aldo, B, DOC and S have an EC50 greater than 1  $\mu$ M for  
36 truncated human GR. Similar changes to higher EC50s were found for the

1 non-mammalian vertebrate GRs. Thus, F, Aldo, DOC and S have EC50s greater 1  $\mu$ M  
2 for truncated *X. laevis* GR. DOC has an EC50 greater 1  $\mu$ M for truncated chicken and  
3 alligator GR. Among the corticosteroids that we studied, DEX is least sensitive and  
4 DOC is most sensitive to the loss of the A, B and C domains.

5         There are several overlapping mechanisms that could account for stronger  
6 response to corticosteroids of full length GRs compared to that of their truncated GR  
7 counterparts. Allosteric interactions between the LBD and the NTD [44, 45, 49] or  
8 DBD [27, 47] are known to influence transcriptional activation of human and rat GRs.  
9 These allosteric interactions may be influenced by post-translational modification of the  
10 NTD by phosphorylation [49, 50] or SUMOylation [51], which also may influence  
11 binding of co-activators [24, 45, 49].

12         Based on Rogerson et al.'s [59] identification of a region in hMR that could  
13 be substituted into hGR and increase its response to Aldo, we analyzed the  
14 corresponding segment on chicken, alligator, *X laevis* and human GRs for clues to  
15 differences in their responses to corticosteroids. Our analysis of this segment (Figure  
16 5) did not find a pattern that can explain the relatively strong responses to Aldo of  
17 chicken and alligator GRs, suggesting that other mechanisms such as interactions with  
18 the LBD of the NTD on alligator and chicken GRs may contribute to the differences in  
19 their response to corticosteroids compared to human and *X. laevis* GRs.

20

#### 21 4.1 Evolution

22         Our data indicate that there were significant changes in the response to  
23 corticosteroids during the evolution of terrestrial vertebrates. Among the species that  
24 we have studied, chicken and alligator are closest, having diverged about 150 million  
25 years ago (myr) from a common ancestor. Consistent with this close relationship, full  
26 length chicken and alligator GRs have similar EC50s for B, Aldo, S and E. In contrast,  
27 full length GR from *X. laevis*, which is the most divergent of the studied  
28 non-mammalian species, has the high EC50s for all tested corticosteroids.

29         It is interesting that human mineralocorticoid receptor [MR], which descended  
30 with the GR from a common ancestor [37, 66, 67], also has an interaction between  
31 domains A and B and the LBD that regulates transcriptional activation by Aldo [39, 68,  
32 69] as does zebrafish MR [70]. The A/B domains on human and zebrafish MR can  
33 interact with each other's LBD, indicating that this is an ancient property of the MR.  
34 This suggests that the role in transcriptional activation of the interaction between the  
35 A/B and LBD domains arose in the common ancestor of the GR and MR. Further  
36 studies of the role in transcriptional activation of the A, B and C domains on the GR and

1 MR should provide insights into the evolution of steroid specificity in these receptors.

2

### 3 **Author Contributions**

4 Yoshinao Katsu and Michael E. Baker conceived and designed the experiments and  
5 wrote the paper. Satomi Kohno and Kaori Oka carried out the research.

6

7 **Declaration of interests:** The authors have no conflict of interest to declare.

8

### 9 **Acknowledgments**

10 We thank colleagues in our laboratories. K.O. was supported by the Japan  
11 Society for the Promotion of Science (JSPS) Research Fellowships for Young Scientists.  
12 This work was supported in part by Grants-in-Aid for Scientific Research 23570067 and  
13 26440159 (YK) from the Ministry of Education, Culture, Sports, Science and  
14 Technology of Japan.

15

### 16 **References**

- 17 [1] Chapman K, Holmes M, Seckl J. 11beta-hydroxysteroid dehydrogenases:  
18 intracellular gate-keepers of tissue glucocorticoid action. *Physiological reviews*.  
19 2013;93:1139-206.
- 20 [2] Kadmiel M, Cidlowski JA. Glucocorticoid receptor signaling in health and disease.  
21 *Trends in pharmacological sciences*. 2013;34:518-30.
- 22 [3] McEwen BS. Physiology and neurobiology of stress and adaptation: central role of  
23 the brain. *Physiological reviews*. 2007;87:873-904.
- 24 [4] Rose AJ, Herzig S. Metabolic control through glucocorticoid hormones: an update.  
25 *Molecular and cellular endocrinology*. 2013;380:65-78.
- 26 [5] Chrousos GP. Stress and sex versus immunity and inflammation. *Sci Signal*.  
27 2010;3:pe36.
- 28 [6] Baker ME. Origin and diversification of steroids: co-evolution of enzymes and  
29 nuclear receptors. *Molecular and cellular endocrinology*. 2011;334:14-20.
- 30 [7] Bridgham JT, Eick GN, Larroux C, Deshpande K, Harms MJ, Gauthier ME, et al.  
31 Protein evolution by molecular tinkering: diversification of the nuclear receptor  
32 superfamily from a ligand-dependent ancestor. *PLoS biology*. 2010;8.
- 33 [8] Markov GV, Tavares R, Dauphin-Villemant C, Demeneix BA, Baker ME, Laudet V.  
34 Independent elaboration of steroid hormone signaling pathways in metazoans. *Proc Natl*  
35 *Acad Sci U S A*. 2009;106:11913-8.
- 36 [9] Sladek FM. What are nuclear receptor ligands? *Molecular and cellular*

- 1 endocrinology. 2011;334:3-13.
- 2 [10] Bertrand S, Belgacem MR, Escriva H. Nuclear hormone receptors in chordates.
- 3 Molecular and cellular endocrinology. 2011;334:67-75.
- 4 [11] Huang P, Chandra V, Rastinejad F. Structural overview of the nuclear receptor
- 5 superfamily: insights into physiology and therapeutics. *Annu Rev Physiol*.
- 6 2010;72:247-72.
- 7 [12] Baker ME, Funder JW, Kattoula SR. Evolution of hormone selectivity in
- 8 glucocorticoid and mineralocorticoid receptors. *J Steroid Biochem Mol Biol*.
- 9 2013;137:57-70.
- 10 [13] Rastinejad F, Huang P, Chandra V, Khorasanizadeh S. Understanding nuclear
- 11 receptor form and function using structural biology. *Journal of molecular endocrinology*.
- 12 2013;51:T1-T21.
- 13 [14] Olefsky JM. Nuclear receptor minireview series. *The Journal of biological*
- 14 *chemistry*. 2001;276:36863-4.
- 15 [15] Bledsoe RK, Montana VG, Stanley TB, Delves CJ, Apolito CJ, McKee DD, et al.
- 16 Crystal structure of the glucocorticoid receptor ligand binding domain reveals a novel
- 17 mode of receptor dimerization and coactivator recognition. *Cell*. 2002;110:93-105.
- 18 [16] Li Y, Suino K, Daugherty J, Xu HE. Structural and biochemical mechanisms for the
- 19 specificity of hormone binding and coactivator assembly by mineralocorticoid receptor.
- 20 *Mol Cell*. 2005;19:367-80.
- 21 [17] Williams SP, Sigler PB. Atomic structure of progesterone complexed with its
- 22 receptor. *Nature*. 1998;393:392-6.
- 23 [18] Brzozowski AM, Pike AC, Dauter Z, Hubbard RE, Bonn T, Engstrom O, et al.
- 24 Molecular basis of agonism and antagonism in the oestrogen receptor. *Nature*.
- 25 1997;389:753-8.
- 26 [19] Godowski PJ, Rusconi S, Miesfeld R, Yamamoto KR. Glucocorticoid receptor
- 27 mutants that are constitutive activators of transcriptional enhancement. *Nature*.
- 28 1987;325:365-8.
- 29 [20] Hollenberg SM, Giguere V, Segui P, Evans RM. Colocalization of DNA-binding
- 30 and transcriptional activation functions in the human glucocorticoid receptor. *Cell*.
- 31 1987;49:39-46.
- 32 [21] Simons SS, Jr., Kumar R. Variable steroid receptor responses: Intrinsically
- 33 disordered AF1 is the key. *Molecular and cellular endocrinology*. 2013;376:81-4.
- 34 [22] Rastinejad F, Ollendorff V, Polikarpov I. Nuclear receptor full-length architectures:
- 35 confronting myth and illusion with high resolution. *Trends in biochemical sciences*.
- 36 2015;40:16-24.

- 1 [23] Kumar R, Thompson EB. Folding of the glucocorticoid receptor N-terminal  
2 transactivation function: dynamics and regulation. *Molecular and cellular endocrinology*.  
3 2012;348:450-6.
- 4 [24] Khan SH, Awasthi S, Guo C, Goswami D, Ling J, Griffin PR, et al. Binding of the  
5 N-terminal region of coactivator TIF2 to the intrinsically disordered AF1 domain of the  
6 glucocorticoid receptor is accompanied by conformational reorganizations. *The Journal*  
7 *of biological chemistry*. 2012;287:44546-60.
- 8 [25] Kumar R, Thompson EB. Influence of flanking sequences on signaling between the  
9 activation function AF1 and DNA-binding domain of the glucocorticoid receptor. *Arch*  
10 *Biochem Biophys*. 2010;496:140-5.
- 11 [26] Li J, Motlagh HN, Chakuroff C, Thompson EB, Hilser VJ. Thermodynamic  
12 dissection of the intrinsically disordered N-terminal domain of human glucocorticoid  
13 receptor. *The Journal of biological chemistry*. 2012;287:26777-87.
- 14 [27] Meijsing SH, Pufall MA, So AY, Bates DL, Chen L, Yamamoto KR. DNA binding  
15 site sequence directs glucocorticoid receptor structure and activity. *Science*.  
16 2009;324:407-10.
- 17 [28] Watson LC, Kuchenbecker KM, Schiller BJ, Gross JD, Pufall MA, Yamamoto KR.  
18 The glucocorticoid receptor dimer interface allosterically transmits sequence-specific  
19 DNA signals. *Nature structural & molecular biology*. 2013;20:876-83.
- 20 [29] Miesfeld R, Godowski PJ, Maler BA, Yamamoto KR. Glucocorticoid receptor  
21 mutants that define a small region sufficient for enhancer activation. *Science*.  
22 1987;236:423-7.
- 23 [30] Hellal-Levy C, Couette B, Fagart J, Souque A, Gomez-Sanchez C, Rafestin-Oblin  
24 M. Specific hydroxylations determine selective corticosteroid recognition by human  
25 glucocorticoid and mineralocorticoid receptors. *FEBS Lett*. 1999;464:9-13.
- 26 [31] Rupprecht R, Arriza JL, Spengler D, Reul JM, Evans RM, Holsboer F, et al.  
27 Transactivation and synergistic properties of the mineralocorticoid receptor: relationship  
28 to the glucocorticoid receptor. *Molecular endocrinology (Baltimore, Md )*.  
29 1993;7:597-603.
- 30 [32] Zhang J, Simisky J, Tsai FT, Geller DS. A critical role of helix 3-helix 5 interaction  
31 in steroid hormone receptor function. *Proc Natl Acad Sci U S A*. 2005;102:2707-12.
- 32 [33] Lim-Tio SS, Keightley MC, Fuller PJ. Determinants of specificity of  
33 transactivation by the mineralocorticoid or glucocorticoid receptor. *Endocrinology*.  
34 1997;138:2537-43.
- 35 [34] Oka K, Kohno S, Urushitani H, Guillette LJ, Jr., Ohta Y, Iguchi T, et al. Molecular  
36 cloning and characterization of the corticoid receptors from the American alligator.



- 1 Molecular and cellular endocrinology. 2013;365:153-61.
- 2 [35] Proszkowiec-Weglarz M, Porter TE. Functional characterization of chicken
- 3 glucocorticoid and mineralocorticoid receptors. American journal of physiology
- 4 Regulatory, integrative and comparative physiology. 2010;298:R1257-68.
- 5 [36] Arriza JL, Simerly RB, Swanson LW, Evans RM. The neuronal mineralocorticoid
- 6 receptor as a mediator of glucocorticoid response. Neuron. 1988;1:887-900.
- 7 [37] Bridgham JT, Carroll SM, Thornton JW. Evolution of hormone-receptor
- 8 complexity by molecular exploitation. Science. 2006;312:97-101.
- 9 [38] Sturm A, Colliar L, Leaver MJ, Bury NR. Molecular determinants of hormone
- 10 sensitivity in rainbow trout glucocorticoid receptors 1 and 2. Molecular and cellular
- 11 endocrinology. 2011;333:181-9.
- 12 [39] Fuller PJ, Yao Y, Yang J, Young MJ. Mechanisms of ligand specificity of the
- 13 mineralocorticoid receptor. J Endocrinol. 2012;213:15-24.
- 14 [40] Hawkins UA, Gomez-Sanchez EP, Gomez-Sanchez CM, Gomez-Sanchez CE. The
- 15 ubiquitous mineralocorticoid receptor: clinical implications. Curr Hypertens Rep.
- 16 2012;14:573-80.
- 17 [41] Rossier BC, Baker ME, Studer RA. Epithelial sodium transport and its control by
- 18 aldosterone: the story of our internal environment revisited. Physiological reviews.
- 19 2015;95:297-340.
- 20 [42] Close DA, Yun SS, McCormick SD, Wildbill AJ, Li W. 11-deoxycortisol is a
- 21 corticosteroid hormone in the lamprey. Proc Natl Acad Sci U S A. 2010;107:13942-7.
- 22 [43] Baker ME, Chandsawangbhuwana C, Ollikainen N. Structural analysis of the
- 23 evolution of steroid specificity in the mineralocorticoid and glucocorticoid receptors.
- 24 BMC Evol Biol. 2007;7:24.
- 25 [44] Oka K, Hoang A, Okada D, Iguchi T, Baker ME, Katsu Y. Allosteric role of the
- 26 amino-terminal A/B domain on corticosteroid transactivation of gar and human
- 27 glucocorticoid receptors. J Steroid Biochem Mol Biol. 2015;154:112-9.
- 28 [45] Christopoulos A, Changeux JP, Catterall WA, Fabbro D, Burris TP, Cidlowski JA,
- 29 et al. International union of basic and clinical pharmacology. XC. multisite
- 30 pharmacology: recommendations for the nomenclature of receptor allosterism and
- 31 allosteric ligands. Pharmacological reviews. 2014;66:918-47.
- 32 [46] Kumar R, Litwack G. Structural and functional relationships of the steroid hormone
- 33 receptors' N-terminal transactivation domain. Steroids. 2009;74:877-83.
- 34 [47] Thomas-Chollier M, Watson LC, Cooper SB, Pufall MA, Liu JS, Borzym K, et al.
- 35 A naturally occurring insertion of a single amino acid rewires transcriptional regulation
- 36 by glucocorticoid receptor isoforms. Proc Natl Acad Sci U S A. 2013;110:17826-31.

- 1 [48] Cho S, Blackford JA, Jr., Simons SS, Jr. Role of activation function domain-1,  
2 DNA binding, and coactivator GRIP1 in the expression of partial agonist activity of  
3 glucocorticoid receptor-antagonist complexes. *Biochemistry*. 2005;44:3547-61.
- 4 [49] Lu NZ, Cidlowski JA. Glucocorticoid receptor isoforms generate transcription  
5 specificity. *Trends Cell Biol*. 2006;16:301-7.
- 6 [50] Arango-Lievano M, Lambert WM, Bath KG, Garabedian MJ, Chao MV, Jeanneteau  
7 F. Neurotrophic-priming of glucocorticoid receptor signaling is essential for neuronal  
8 plasticity to stress and antidepressant treatment. *Proc Natl Acad Sci U S A*.  
9 2015;112:15737-42.
- 10 [51] Hua G, Paulen L, Chambon P. GR SUMOylation and formation of an  
11 SUMO-SMRT/NCoR1-HDAC3 repressing complex is mandatory for GC-induced IR  
12 nGRE-mediated transrepression. *Proc Natl Acad Sci U S A*. 2016;113:E626-34.
- 13 [52] Katsu Y, Kubokawa K, Urushitani H, Iguchi T. Estrogen-dependent transactivation  
14 of amphioxus steroid hormone receptor via both estrogen and androgen response  
15 elements. *Endocrinology*. 2010;151:639-48.
- 16 [53] Bury NR, Sturm A, Le Rouzic P, Lethimonier C, Ducouret B, Guiguen Y, et al.  
17 Evidence for two distinct functional glucocorticoid receptors in teleost fish. *J Mol*  
18 *Endocrinol*. 2003;31:141-56.
- 19 [54] Greenwood AK, Butler PC, White RB, DeMarco U, Pearce D, Fernald RD.  
20 Multiple corticosteroid receptors in a teleost fish: distinct sequences, expression patterns,  
21 and transcriptional activities. *Endocrinology*. 2003;144:4226-36.
- 22 [55] Stolte EH, de Mazon AF, Leon-Koosterziel KM, Jesiak M, Bury NR, Sturm A, et al.  
23 Corticosteroid receptors involved in stress regulation in common carp, *Cyprinus carpio*.  
24 *J Endocrinol*. 2008;198:403-17.
- 25 [56] Sturm A, Bury N, Dengreville L, Fagart J, Flouriot G, Rafestin-Oblin ME, et al.  
26 11-deoxycorticosterone is a potent agonist of the rainbow trout (*Oncorhynchus mykiss*)  
27 mineralocorticoid receptor. *Endocrinology*. 2005;146:47-55.
- 28 [57] Carroll SM, Bridgham JT, Thornton JW. Evolution of hormone signaling in  
29 elasmobranchs by exploitation of promiscuous receptors. *Molecular biology and*  
30 *evolution*. 2008;25:2643-52.
- 31 [58] Carroll SM, Ortlund EA, Thornton JW. Mechanisms for the evolution of a derived  
32 function in the ancestral glucocorticoid receptor. *PLoS Genet*. 2011;7:e1002117.
- 33 [59] Rogerson FM, Yao YZ, Elsass RE, Dimopoulos N, Smith BJ, Fuller PJ. A critical  
34 region in the mineralocorticoid receptor for aldosterone binding and activation by  
35 cortisol: evidence for a common mechanism governing ligand binding specificity in  
36 steroid hormone receptors. *Mol Endocrinol*. 2007;21:817-28.

- 1 [60] Romero LM. Seasonal changes in plasma glucocorticoid concentrations in  
2 free-living vertebrates. *Gen Comp Endocrinol.* 2002;128:1-24.
- 3 [61] Cockrem JF. Individual variation in glucocorticoid stress responses in animals. *Gen*  
4 *Comp Endocrinol.* 2013;181:45-58.
- 5 [62] Martinerie L, Munier M, Le Menuet D, Meduri G, Viengchareun S, Lombes M.  
6 The mineralocorticoid signaling pathway throughout development: expression,  
7 regulation and pathophysiological implications. *Biochimie.* 2013;95:148-57.
- 8 [63] Odermatt A, Atanasov AG. Mineralocorticoid receptors: emerging complexity and  
9 functional diversity. *Steroids.* 2009;74:163-71.
- 10 [64] Funder JW. Aldosterone and mineralocorticoid receptors: a personal reflection.  
11 *Molecular and cellular endocrinology.* 2012;350:146-50.
- 12 [65] Odermatt A, Kratschmar DV. Tissue-specific modulation of mineralocorticoid  
13 receptor function by 11beta-hydroxysteroid dehydrogenases: an overview. *Molecular*  
14 *and cellular endocrinology.* 2012;350:168-86.
- 15 [66] Baker ME, Nelson DR, Studer RA. Origin of the response to adrenal and sex  
16 steroids: Roles of promiscuity and co-evolution of enzymes and steroid receptors. *J*  
17 *Steroid Biochem Mol Biol.* 2015;151:12-24.
- 18 [67] Mani O, Nashev LG, Livelov C, Baker ME, Odermatt A. Role of Pro-637 and  
19 Gln-642 in human glucocorticoid receptors and Ser-843 and Leu-848 in  
20 mineralocorticoid receptors in their differential responses to cortisol and aldosterone. *J*  
21 *Steroid Biochem Mol Biol.* 2016;159:31-40.
- 22 [68] Pippal JB, Yao Y, Rogerson FM, Fuller PJ. Structural and functional  
23 characterization of the interdomain interaction in the mineralocorticoid receptor. *Mol*  
24 *Endocrinol.* 2009;23:1360-70.
- 25 [69] Rogerson FM, Fuller PJ. Interdomain interactions in the mineralocorticoid receptor.  
26 *Molecular and cellular endocrinology.* 2003;200:45-55.
- 27 [70] Pippal JB, Cheung CM, Yao YZ, Brennan FE, Fuller PJ. Characterization of the  
28 zebrafish (*Danio rerio*) mineralocorticoid receptor. *Molecular and cellular*  
29 *endocrinology.* 2011;332:58-66.
- 30
